# Supplementary material for: Locus coeruleus integrity is related to tau burden and memory loss in autosomal-dominant Alzheimer’s disease
Source: PubMed Central journal article supplement — Neurobiol Aging. Author manuscript; Available in PMC 2023 Apr 1. (PMC8976827; doi:10.1016/j.neurobiolaging.2021.11.006), 2021-12-07
Supplement: NIHMS1779258-supplement-1.pdf [file NIHMS1779258-supplement-1.pdf]

1269 **9. Supplementary information**

1270

1271 **Table S1:** Associations of locus coeruleus intensity and regional tau burden

| Region of interest <sup>1</sup> | <i>rho</i> | <i>p</i> |
|---------------------------------|------------|----------|
| bankssts                        | -0.688     | 0.004    |
| transversetemporal              | -0.656     | 0.007    |
| postcentral                     | -0.641     | 0.009    |
| inferiorparietal                | -0.641     | 0.009    |
| inferiortemporal                | -0.638     | 0.009    |
| cuneus                          | -0.624     | 0.012    |
| fusiform                        | -0.609     | 0.014    |
| parstriangularis                | -0.582     | 0.02     |
| pericalcarine                   | -0.553     | 0.029    |
| posteriorcingulate              | -0.544     | 0.032    |
| precuneus                       | -0.532     | 0.036    |
| caudalmiddlefrontal             | -0.526     | 0.038    |
| entorhinal                      | -0.524     | 0.04     |
| lingual                         | -0.509     | 0.046    |
| middletemporal                  | -0.509     | 0.046    |
| isthmuscingulate                | -0.503     | 0.049    |
| temporalpole                    | -0.497     | 0.052    |
| lateraloccipital                | -0.494     | 0.054    |
| caudalanteriorcingulate         | -0.488     | 0.057    |
| rostralanteriorcingulate        | -0.476     | 0.064    |
| superiorparietal                | -0.459     | 0.076    |
| paracentral                     | -0.459     | 0.076    |
| parahippocampal                 | -0.456     | 0.078    |
| insula                          | -0.441     | 0.089    |
| lateralorbitofrontal            | -0.435     | 0.094    |
| parsorbitalis                   | -0.418     | 0.109    |
| frontalpole                     | -0.409     | 0.117    |
| parsopercularis                 | -0.403     | 0.123    |
| precentral                      | -0.382     | 0.145    |
| medialorbitofrontal             | -0.376     | 0.151    |
| superiortemporal                | -0.365     | 0.165    |
| superiorfrontal                 | -0.312     | 0.239    |
| rostralmiddlefrontal            | -0.282     | 0.288    |
| supramarginal                   | -0.232     | 0.385    |

1272 *Note:* <sup>1</sup>Parcellation based on Desikan et al., (2006).

1273 Tau data was averaged across hemispheres before analysis (see *Material and methods*).

1274 *Rho* and *p* values are based on non-parametric Spearman's correlations (n = 16).

1275

1276 **Table S2:** Associations of locus coeruleus intensity and cognitive performance

| Cognitive task          | <i>rho</i> | <i>p</i> |
|-------------------------|------------|----------|
| Craft Story             | 0.62       | 0.008    |
| Complex Figure Delay    | 0.589      | 0.013    |
| Trails B                | 0.498      | 0.042    |
| Number Span Backward    | 0.459      | 0.064    |
| SEVLT_total (trial 1-5) | 0.447      | 0.072    |
| CASI                    | 0.286      | 0.265    |
| SEVLT long delay        | 0.006      | 0.981    |
| MoCA                    | -0.02      | 0.94     |
| Digit Symbol            | -0.16      | 0.539    |
| CDR                     | -0.405     | 0.107    |

1277 *Note:* *Rho* and *p* values are based on non-parametric Spearman's correlations ( $n = 17$ ). See

1278 *Material and methods* for a description of the cognitive tasks.

1279
